# Supplementary material for: The Dark Side of the Salad: Salmonella typhimurium Overcomes the Innate Immune Response of Arabidopsis thaliana and Shows an Endopathogenic Lifestyle
Source: PubMed Central journal article supplement (PMC2386236; doi:10.1371/journal.pone.0002279), 2008-05-28
Supplement: pone.0002279.s002.pdf [file pone.0002279.s002.pdf]

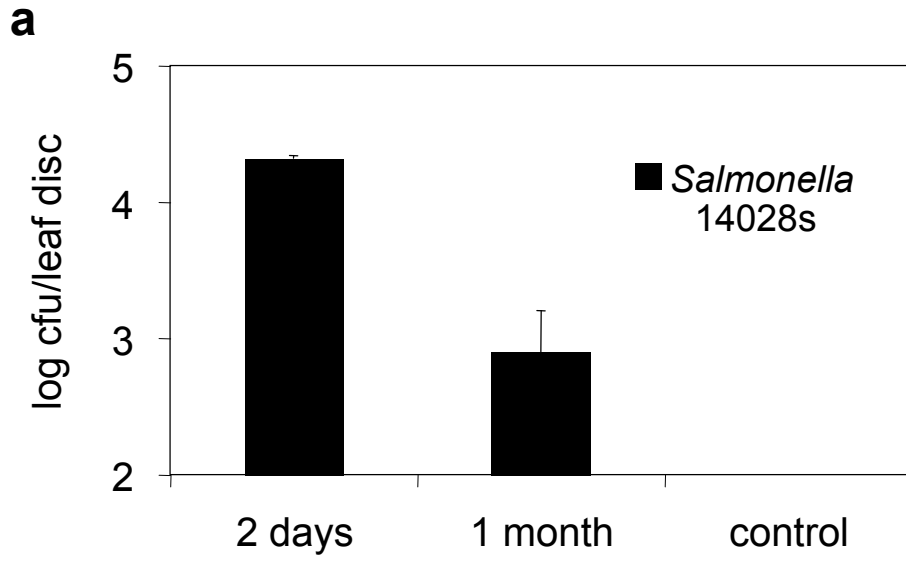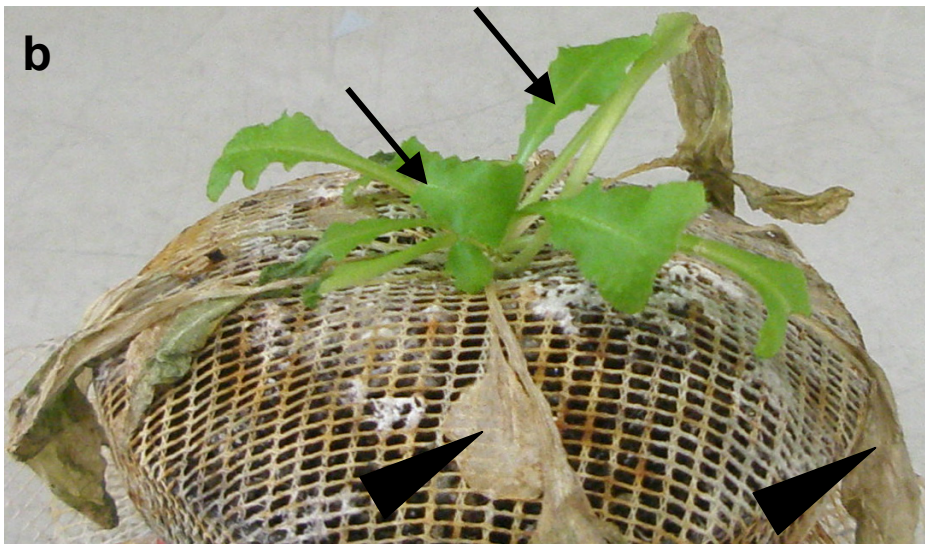

Schikora et al., Figure S2.
